# Supplementary material
Source: PubMed Central journal article supplement (PMC6192699)
Supplement: NIHMS975846-supplement-Supplemental_Tables.pdf [file NIHMS975846-supplement-Supplemental_Tables.pdf]

## SUPPLEMENTAL MATERIAL

Supplemental Table 1. Parametric Mapping Techniques

Supplemental Table 2. QUADAS Questionnaire

Supplemental Table 3. Lake Louise Component Sensitivities and Specificities

Supplemental Table 1. Parametric Mapping Techniques

| First Author Year                 | Parameters  | Scanner         | Vendor  | Field Strength (Tesla) | T1 Sequence       | T2 Sequence                    | Threshold Optimization Method                  | T1 Cut-off (ms) | T2 Cut-off (ms) | ECV Cut-off (%) |
|-----------------------------------|-------------|-----------------|---------|------------------------|-------------------|--------------------------------|------------------------------------------------|-----------------|-----------------|-----------------|
| Baeßler 2017                      | T2          | Achieva         | Philips | 1.5                    | n/a               | GraSE                          | Classification trees with logistic regressions | n/a             | Not Reported    | n/a             |
| Nadjiri 2017                      | T1, ECV     | Magnetom Avanto | Siemens | 1.5                    | MOLLI 4(1)3(1)2   | n/a                            | Not Reported                                   | >970            | n/a             | >32.4           |
| von Knobelsdorff-Brenkenhoff 2017 | T1, T2, ECV | Magnetom Avanto | Siemens | 1.5                    | MOLLI 5(3)3       | T2-SSFP                        | Youden index                                   | >981            | >52.3           | >24.1           |
| Lurz 2016                         | T1, T2, ECV | Intera CV       | Philips | 1.5                    | MOLLI 3(3)5       | Navigator-Gated Multi-Echo FSE | Youden index                                   | >1058           | >58.8           | >32.6           |
| Luetkens 2016                     | T1, T2, ECV | Ingenia         | Philips | 1.5                    | MOLLI 3(3)3(3)5   | GraSE                          | Reclassification accuracy                      | >1000           | >55.9           | >28.8           |
|                                   |             |                 |         |                        | ShMOLLI 5(1)1(1)  |                                |                                                | >852            |                 |                 |
| Hinojar 2015                      | T1          | Achieva         | Philips | 1.5                    | MOLLI 3(3)3(3)5   | n/a                            | 2 SD above the mean                            | >992            | n/a             | n/a             |
|                                   |             |                 |         | 3.0                    |                   |                                |                                                | >1098           |                 |                 |
| Bohnen 2015                       | T2          | Achieva         | Philips | 1.5                    | n/a               | GraSE                          | Youden index                                   | n/a             | >60.0           | n/a             |
| Radunski 2014                     | T1, T2, ECV | Achieva         | Philips | 1.5                    | MOLLI 5(3)3       | Navigator-Gated Multi-Echo FSE | Youden index                                   | >1074           | >61.0           | >29.0           |
| Luetkens 2014                     | T1, ECV     | Ingenia         | Philips | 3.0                    | MOLLI 3(3)3(3)5   | n/a                            | Reclassification accuracy                      | >1140           | n/a             | >26.3           |
| Ferreira 2014                     | T1          | Avanto          | Siemens | 1.5                    | ShMOLLI 5(1)1(1)1 | n/a                            | Predefined Threshold                           | >990            | n/a             | n/a             |

AUC = Area under the curve; ECV = extracellular volume; FSE = Fast spin echo; GraSE = Gradient Spin Echo; MOLLI = Modified Look-Locker Inversion Recovery; ms = milliseconds; ROC = Receiver operating characteristic; SD = standard deviation; ShMOLLI = Shortened Modified Look-Locker Inversion Recovery; T2P-SSFP = T2-prepared steady-state free precession.



Supplemental Table 3. Lake Louise Component Sensitivities and Specificities

| First Author Year | Sensitivity |     |     |           | Specificity |     |     |           | Accuracy |     |     |           |
|-------------------|-------------|-----|-----|-----------|-------------|-----|-----|-----------|----------|-----|-----|-----------|
|                   | LLC         | LGE | EGE | T2w Ratio | LLC         | LGE | EGE | T2w Ratio | LLC      | LGE | EGE | T2w Ratio |
| Baeßler 2017      | 58          | 52  | 48  | 40        | 100         | 100 | 100 | 77        | 67       | 62  | 59  | 47        |
| Galea 2017†       | 70          | 76  | 69  | 67        | 90          | 75  | 70  | 80        | 77       | 76  | 69  | 72        |
| Imbriaco 2017     | 73          | 77  | 75  | 71        | 100         | 100 | 100 | 100       | 78       | 82  | 80  | 77        |
| Luetkens 2017     | 81          | n/a | n/a | n/a       | 97          | n/a | n/a | n/a       | 88       | n/a | n/a | n/a       |
| Nadjiri 2017      | 56          | n/a | n/a | n/a       | 87          | n/a | n/a | n/a       | 84       | n/a | n/a | n/a       |
| Lurz 2016         | 65          | n/a | n/a | n/a       | 44          | n/a | n/a | n/a       | 59       | n/a | n/a | n/a       |
| Luetkens 2016     | 82          | 74  | 77  | 50        | 98          | 100 | 62  | 94        | 92       | 89  | 68  | 76        |
| Schwab 2016       | 67          | 86  | 51  | 56        | 100         | 100 | 94  | 100       | 82       | 92  | 70  | 76        |
| Radunski 2014     | 84          | 61  | 63  | 76        | 57          | 100 | 71  | 42        | 79       | 68  | 64  | 70        |
| Luetkens 2014     | 92          | 75  | 83  | 79        | 80          | 100 | 42  | 61        | 84       | 91  | 57  | 68        |
| Lurz 2012         | 81          | 74  | 76  | 64        | 71          | 65  | 53  | 65        | 79       | 72  | 70  | 64        |
| Chu 2012†         | 77          | 77  | 65  | 69        | 90          | 60  | 90  | 100       | 80       | 73  | 71  | 76        |
| Abdel-Aty 2005    | 76          | 44  | 80  | 84        | 96          | 100 | 68  | 74        | 86       | 71  | 74  | 79        |
| Pooled Estimate‡  | 76          | 68  | 66  | 65        | 89          | 94  | 70  | 79        | 80       | 77  | 67  | 70        |

†Study included multiple thresholds for EGE; reported values were based on the median threshold used

‡Pooled estimates were sampled-weighted and only included studies that provided LGE, EGE, and T2w ratio values

EGE = Early gadolinium enhancement; LGE = Late gadolinium enhancement; LLC = Lake Louise Criteria; T2w = T2-weighted.
